# Supplementary material for: Synergistic effect of the responses of different tissues against African swine fever virus
Source: PubMed Central journal article supplement — Transbound Emerg Dis. 2021 Aug 18;69(4):e204–15. doi: 10.1111/tbed.14283 (PMC9544764; doi:10.1111/tbed.14283), 2021-08-18
Supplement: TBED-69-e204-s001.pdf [file TBED-69-e204-s001.pdf]

**A** The Most Enrichment GO Terms of Lung

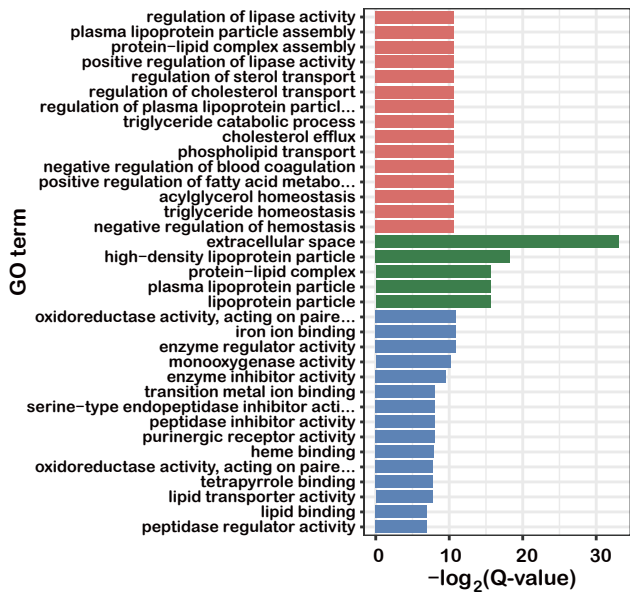

**B** The Most Enrichment GO Terms of Liver

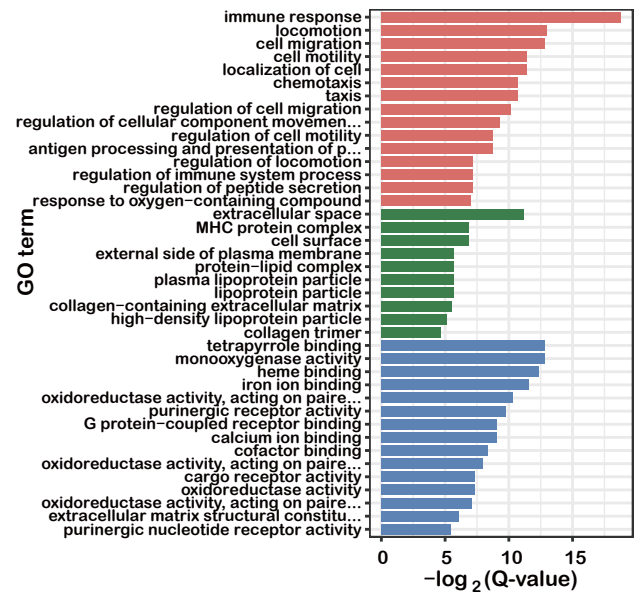

**C** The Most Enrichment GO Terms of Lymphaden

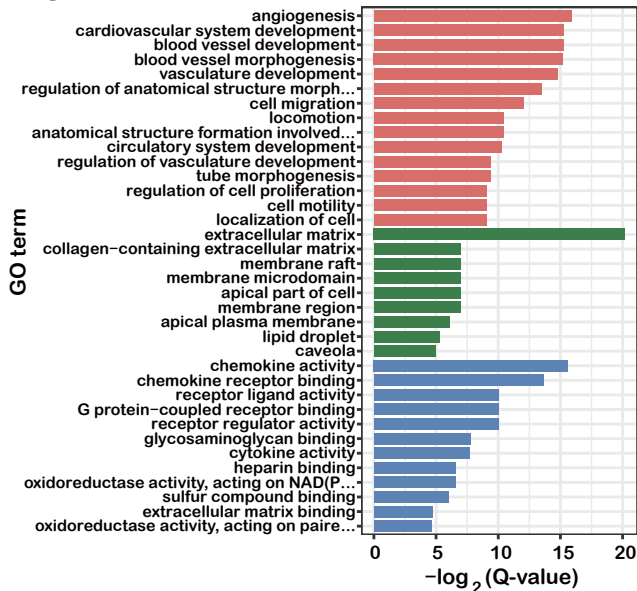

**D** The Most Enrichment GO Terms of Spleen

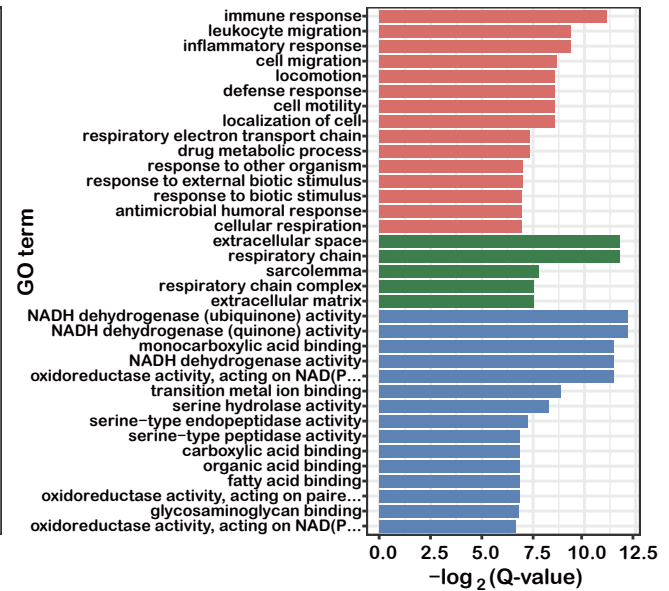

**E** The Most Enrichment GO Terms of Kidney

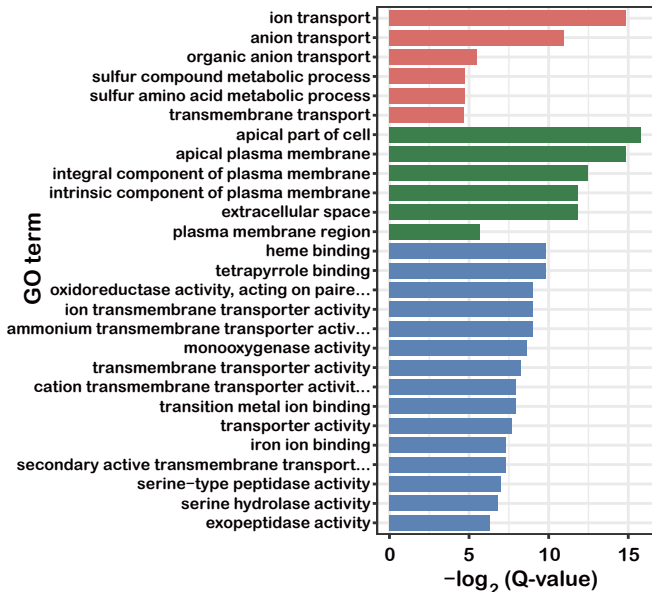

■ Biological Process  
■ Cellular Component  
■ Molecular Function
