# Supplementary figures and images for: Synergistic effect of the responses of different tissues against African swine fever virus
Source: PubMed Central journal article supplement — Transbound Emerg Dis. 2021 Aug 18;69(4):e204–15. doi: 10.1111/tbed.14283 (PMC9544764; doi:10.1111/tbed.14283), 2021-08-18

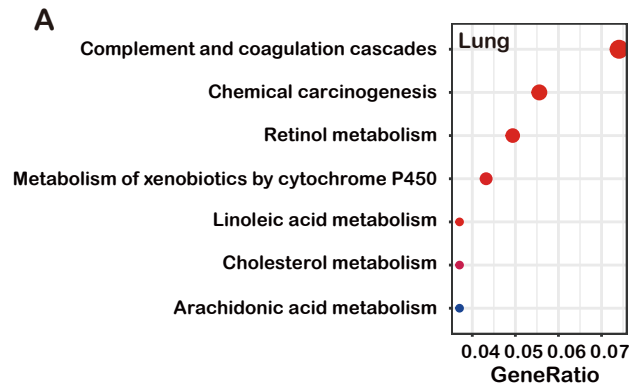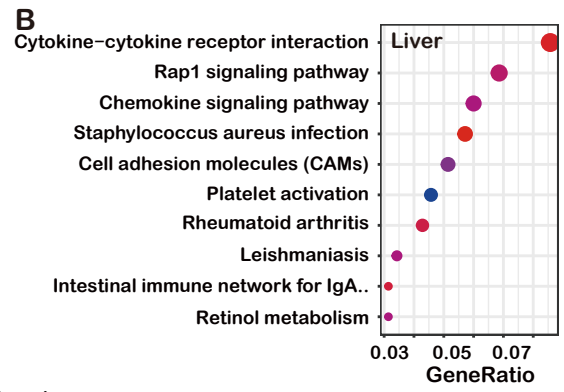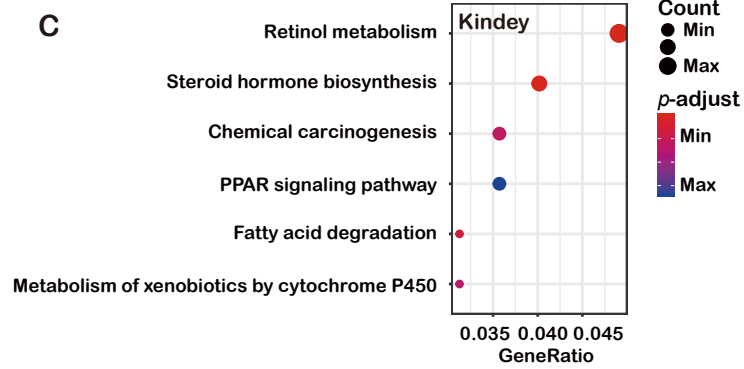

Supplement: TBED-69-e204-s002.pdf [file TBED-69-e204-s002.pdf]

**A**

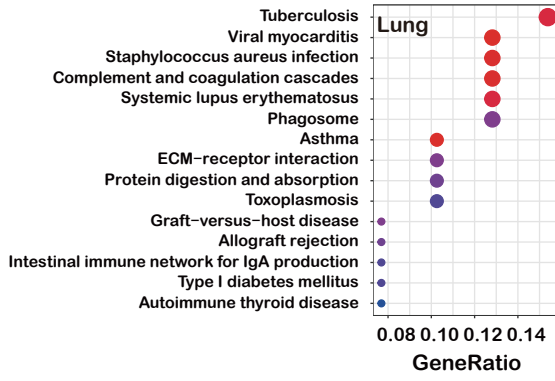

**B**

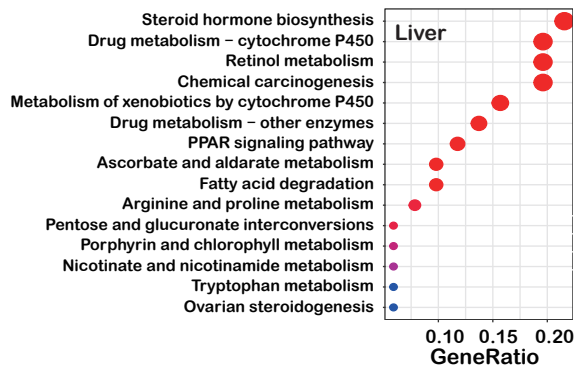

**C**

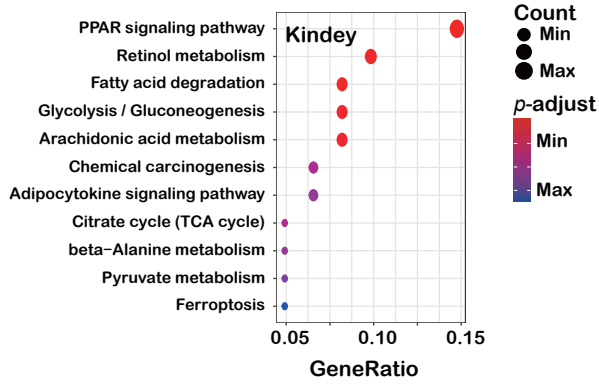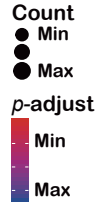

Supplement: TBED-69-e204-s004.pdf [file TBED-69-e204-s004.pdf]

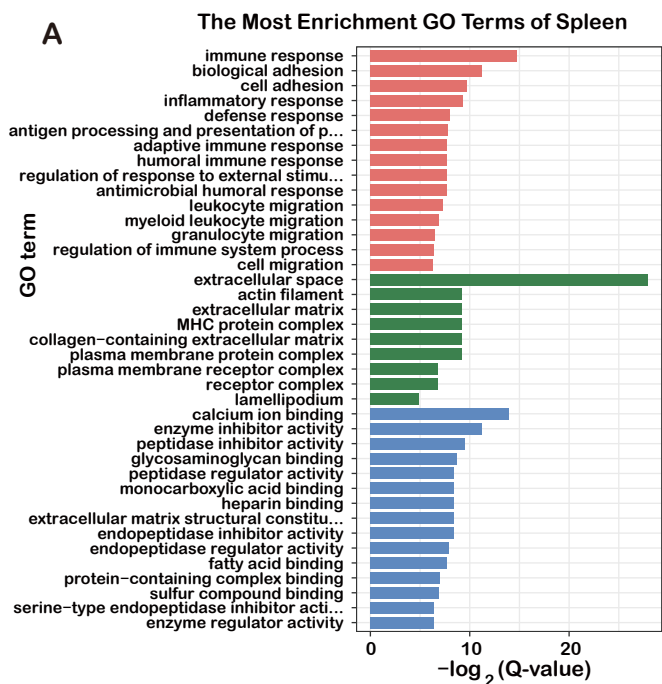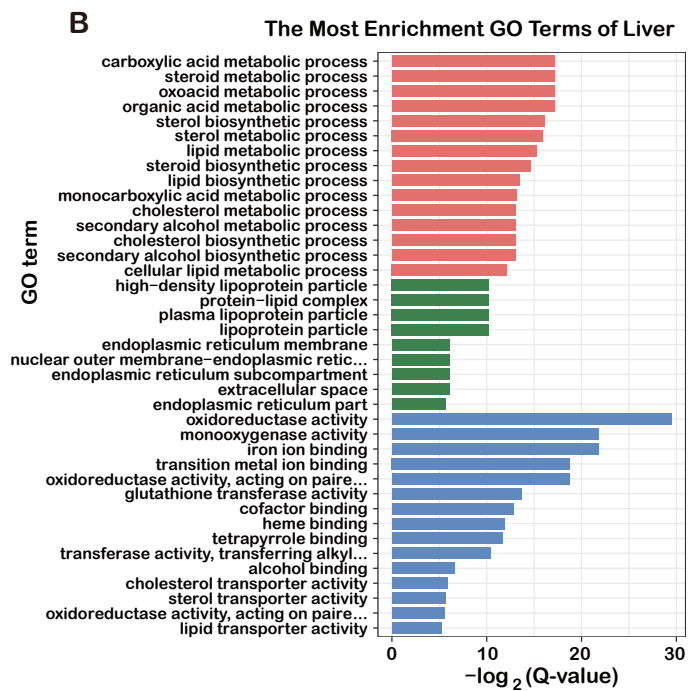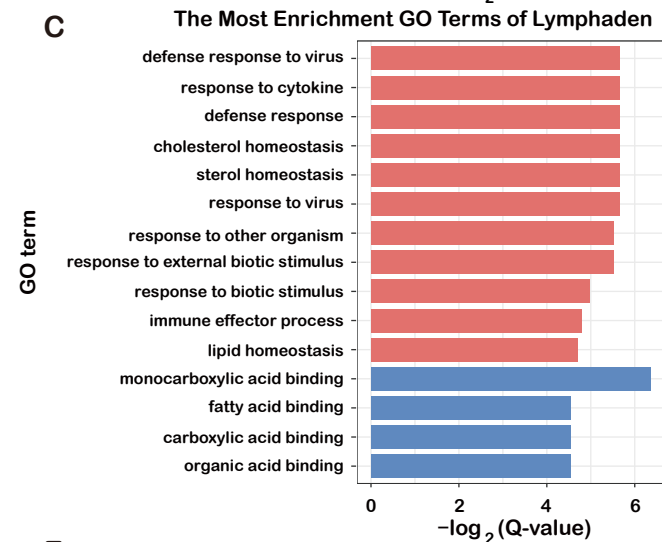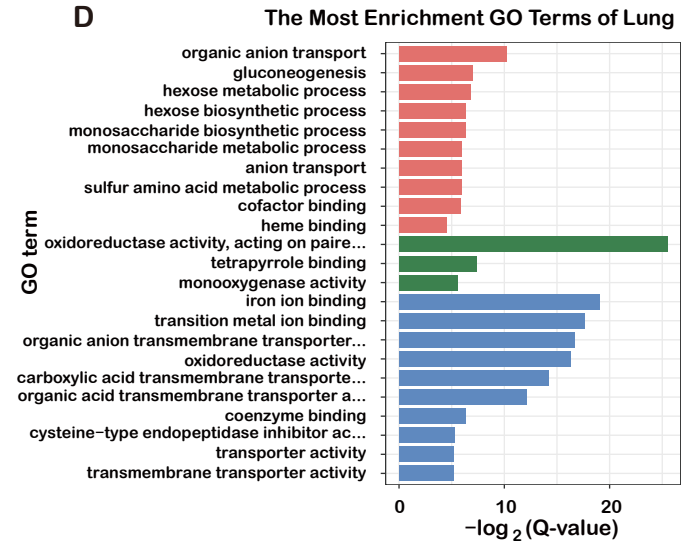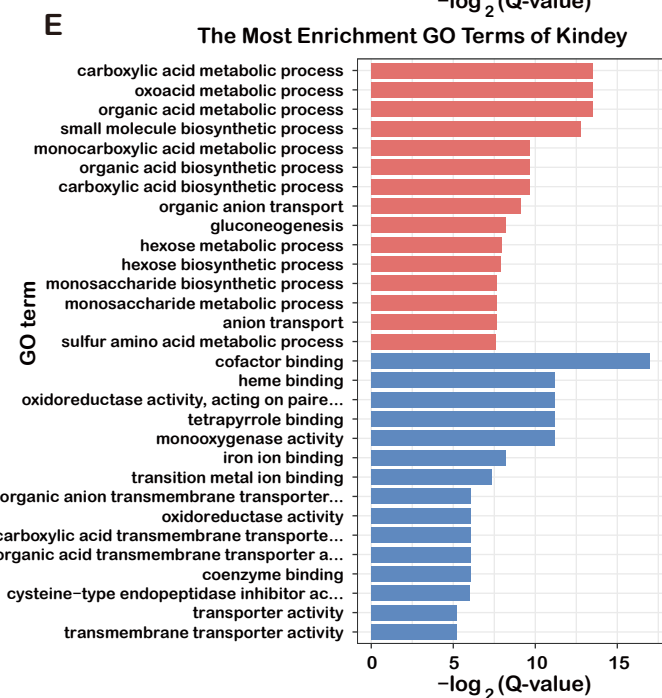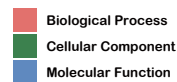

Supplement: TBED-69-e204-s005.pdf [file TBED-69-e204-s005.pdf]
